# Supplementary material for: Top gate overlaid carbon nanotube transistor electronic synapse arrays for high-performance image recognition
Source: Royal Society of Chemistry journal article supplement (doi:10.1039/d5tc00252d), 2025-01-01
Supplement: d5tc00252d1.pdf [file d5tc00252d1.pdf]

## Supporting Information

### Top Gate Overlaid Carbon Nanotube Transistor Electronic Synapses Arrays for High-Performance Image Recognition

Zhenfei Hou<sup>a</sup>, Gang Niu<sup>b\*</sup>, Yachuan Wang<sup>c</sup>, Haoyan Meng<sup>b</sup>, Jun Yang<sup>b</sup>, Bin Zhang<sup>c\*</sup>, Yuan Zhao<sup>a</sup>, Jie Li<sup>a</sup> and Shengli Wu<sup>a\*</sup>

- <sup>a.</sup> *Key Laboratory for Physical Electronics and Devices of the Ministry of Education, School of Electronic Science and Engineering, Faculty of Electronic and Information Engineering, Xi'an Jiaotong University, Xi'an 71004, China*
- <sup>b.</sup> *State Key Laboratory for Manufacturing Systems Engineering; Electronic Materials Research Laboratory, Key Laboratory of the Ministry of Education, School of Electronic Science and Engineering, Xi'an Jiaotong University, Xi'an 710049, China*
- <sup>c.</sup> *National Key Laboratory of Human-Machine Hybrid Augmented Intelligence, National Engineering Research Center for Visual information and Applications, and School of Software, Xi'an Jiaotong University, Xi'an, 71004, China*

### Supplementary information

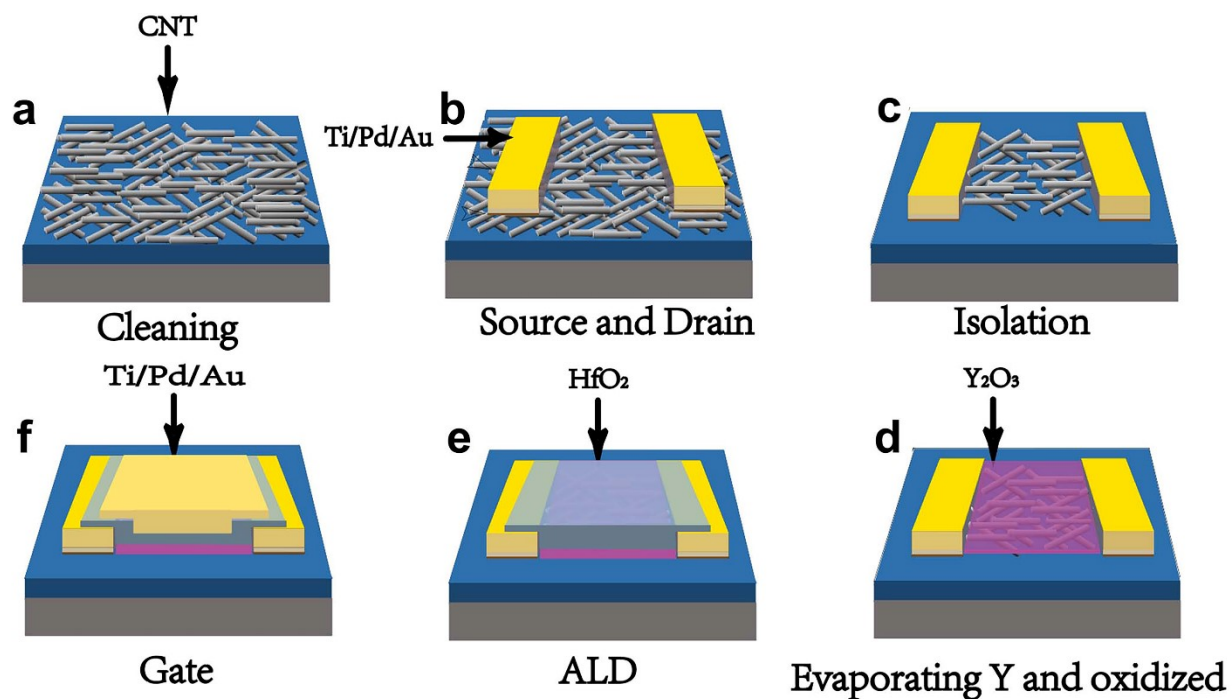

Fig. S1 Schematics showing the process for fabricating a synaptic CNT transistor. (a) A randomly distributed CNT network is deposited. (b) The source (S) and drain (D) electrodes are fabricated and interconnected in the circuit. (c) The CNT network is patterned as a transistor channel. (d) Evaporating Y on the top of the CNT channel and oxidized at 270°C. (e) HfO<sub>2</sub> is grown by ALD. (f) A top gate (G) metal electrode is fabricated on top of the HfO<sub>2</sub> dielectric.

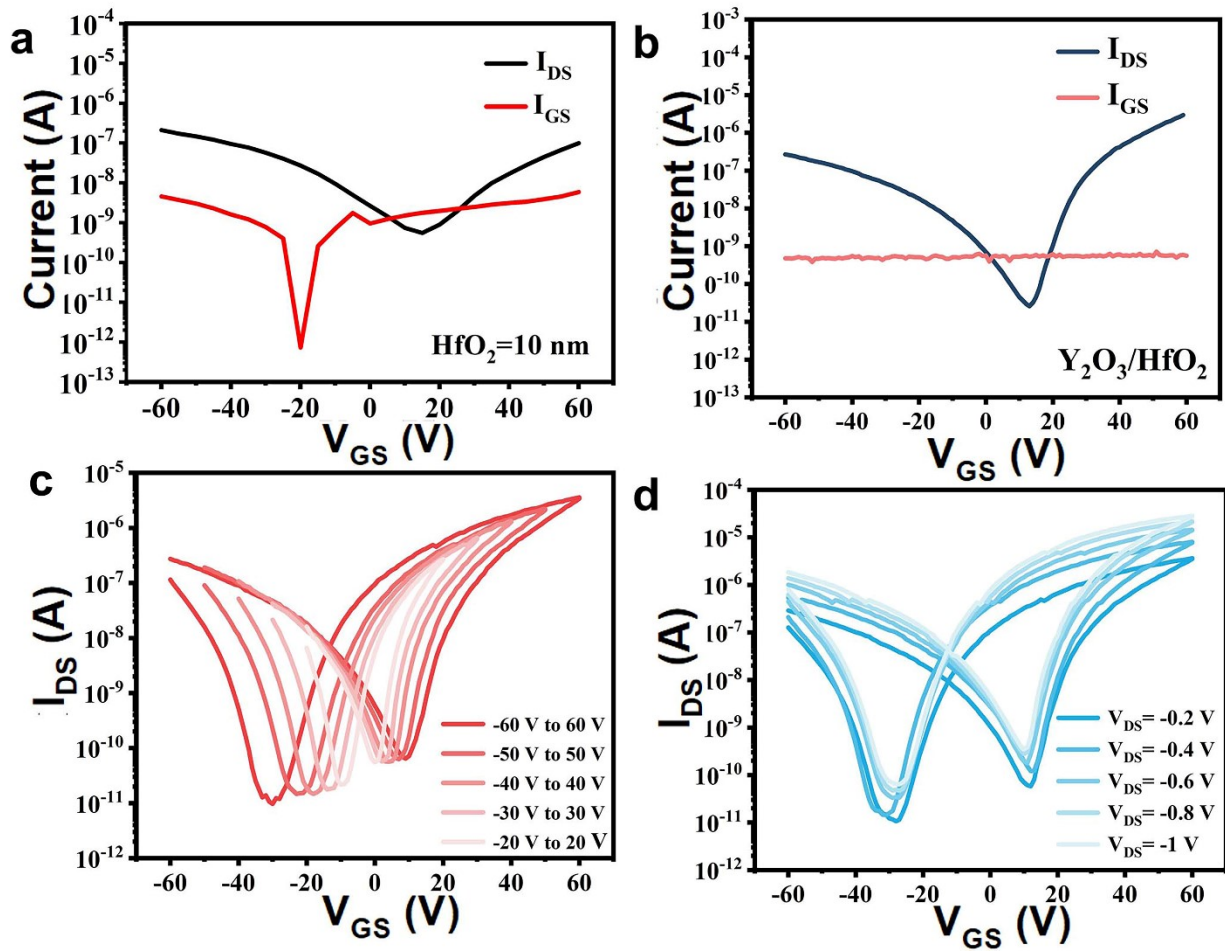

Fig. S2 (a) The transfer curves of back-gate CNTFET with 10 nm HfO<sub>2</sub>. (b) The transfer curves of back-gate CNTFET with Y<sub>2</sub>O<sub>3</sub>/10 nm HfO<sub>2</sub>. (c) The hysteresis curve of back-gate CNTFET with Y<sub>2</sub>O<sub>3</sub>/10 nm HfO<sub>2</sub>. (d) The hysteresis curve of back-gate CNTFET with Y<sub>2</sub>O<sub>3</sub>/10 nm HfO<sub>2</sub>.

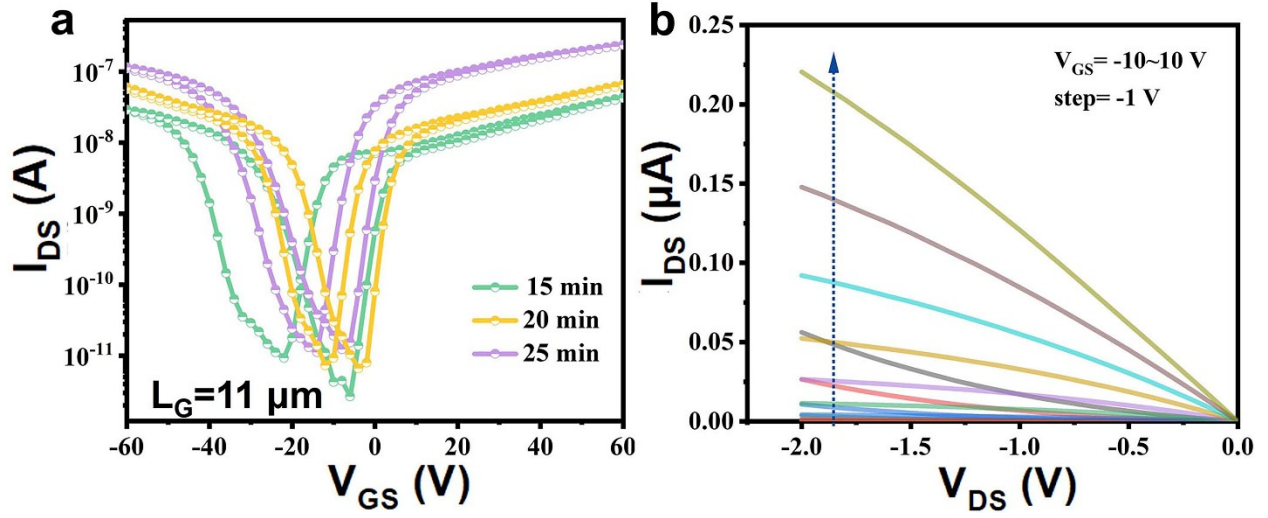

Fig. S3 (a) The transfer curves of back-gate CNTFET with different oxidation times of yttrium. (b) The output curves of back-gate CNTFET with oxidation times of yttrium was 15 min.

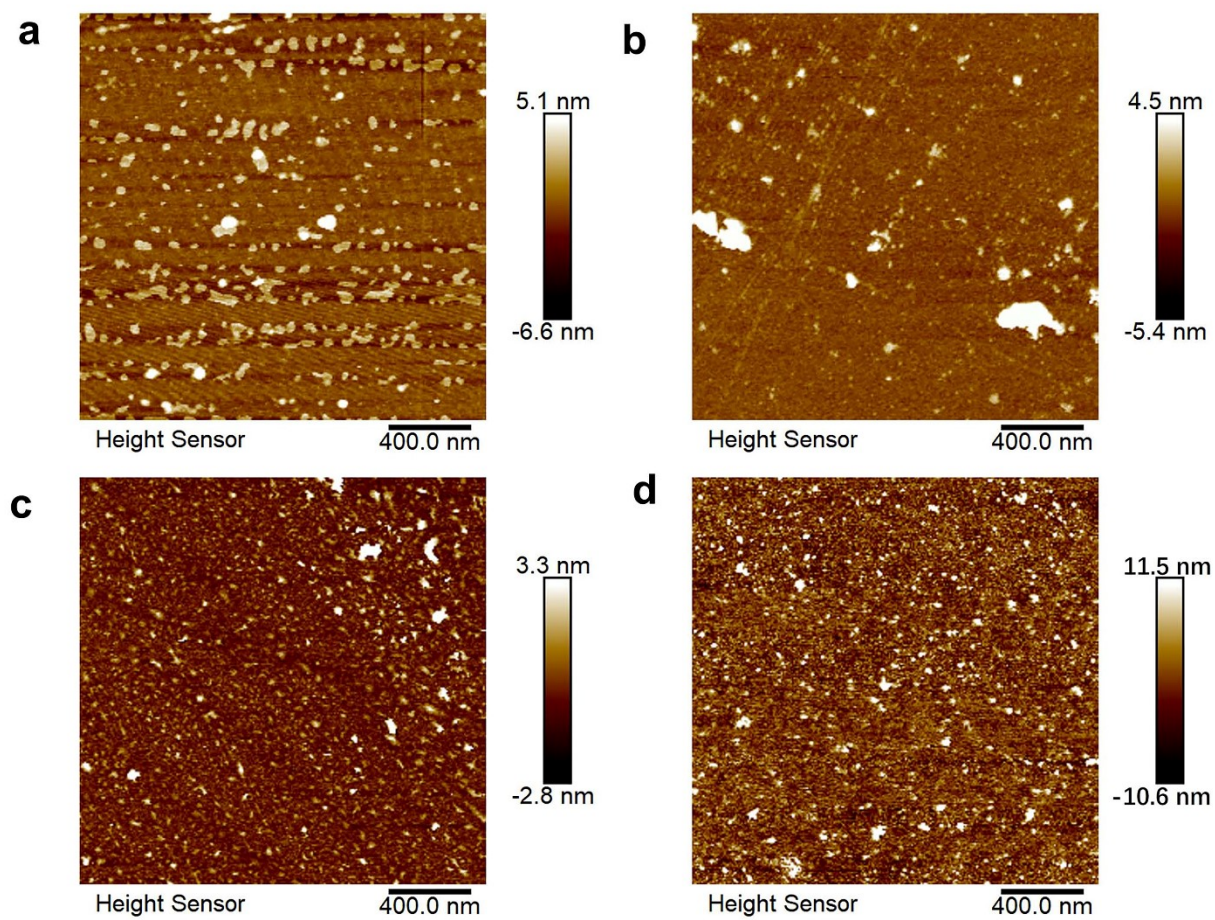

Fig. S4 AFM phase images of yttrium oxidation with (a) 15 min, (b) 20 min, (c) 25 min and (d) HfO<sub>2</sub>, respectively.

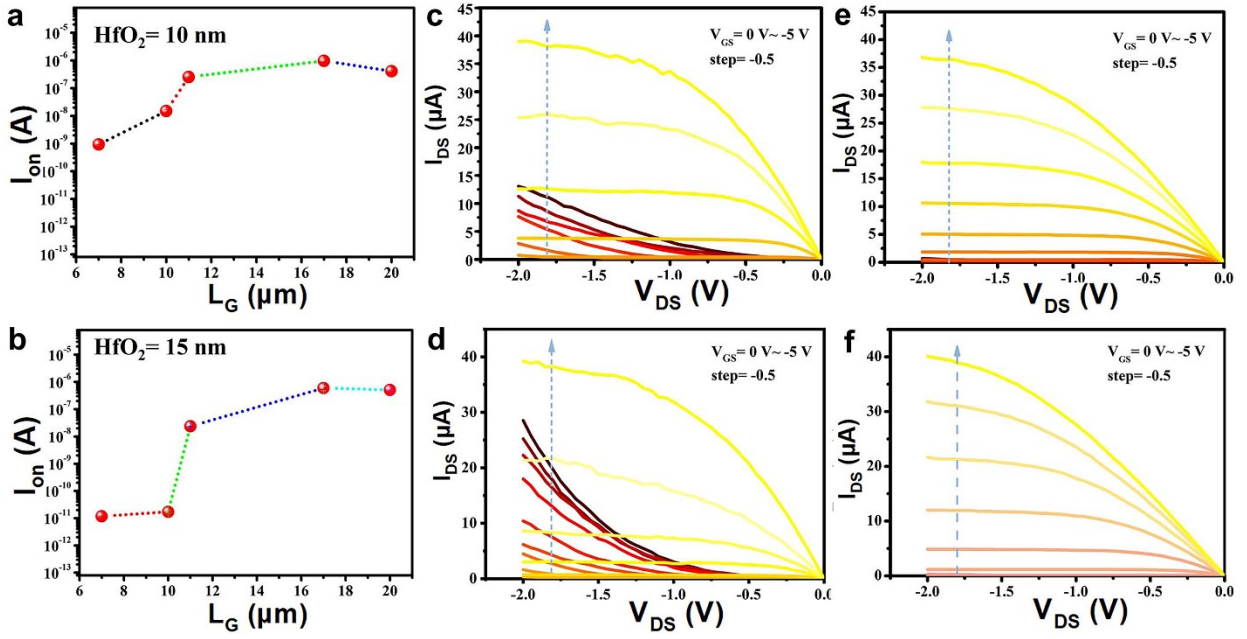

Fig. S5 (a) The on-state current as a function of gate length with CNTFET ( $V_{DS} = -0.2$  V;  $HfO_2 = 10$  nm). (b) The on-state current as a function of gate length with CNTFET ( $V_{DS} = -0.2$  V;  $HfO_2 = 15$  nm). The output curve of CNTFET (c) and annealed CNTFET (e) with 10 nm  $HfO_2$ . The output curve of CNTFET (c) and annealed CNTFET (e) with 15 nm  $HfO_2$ .



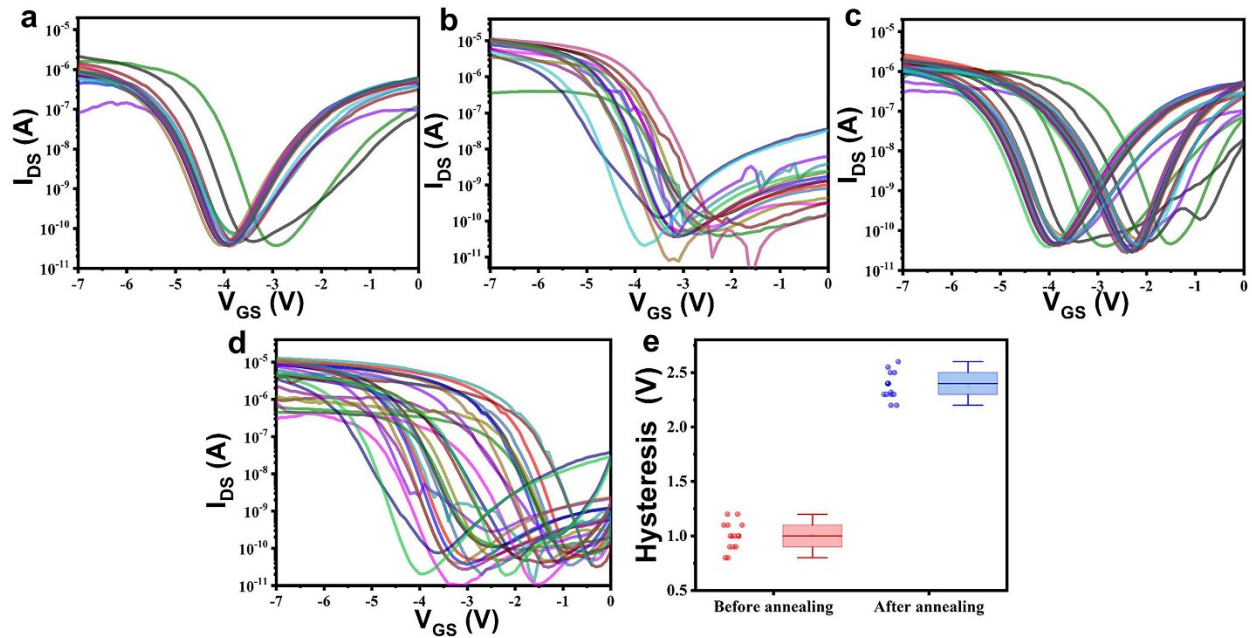

Fig. S6 Transfer curves of TGO-CNTFET (a) and annealed TGO-CNTFET (b). Hysteresis curves of TGO-CNTFET (c) and annealed TGO-CNTFET (d). (e) box plots of hysteresis windows corresponding to hysteresis curves of TGO-CNTFET and annealed TGO-CNTFET.

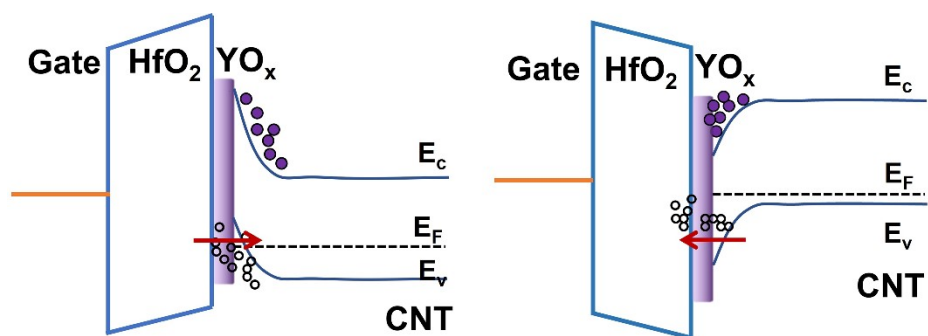

Fig. S7 Energy band diagram illustrating charge-trapping effects in TGO-CNTFET.



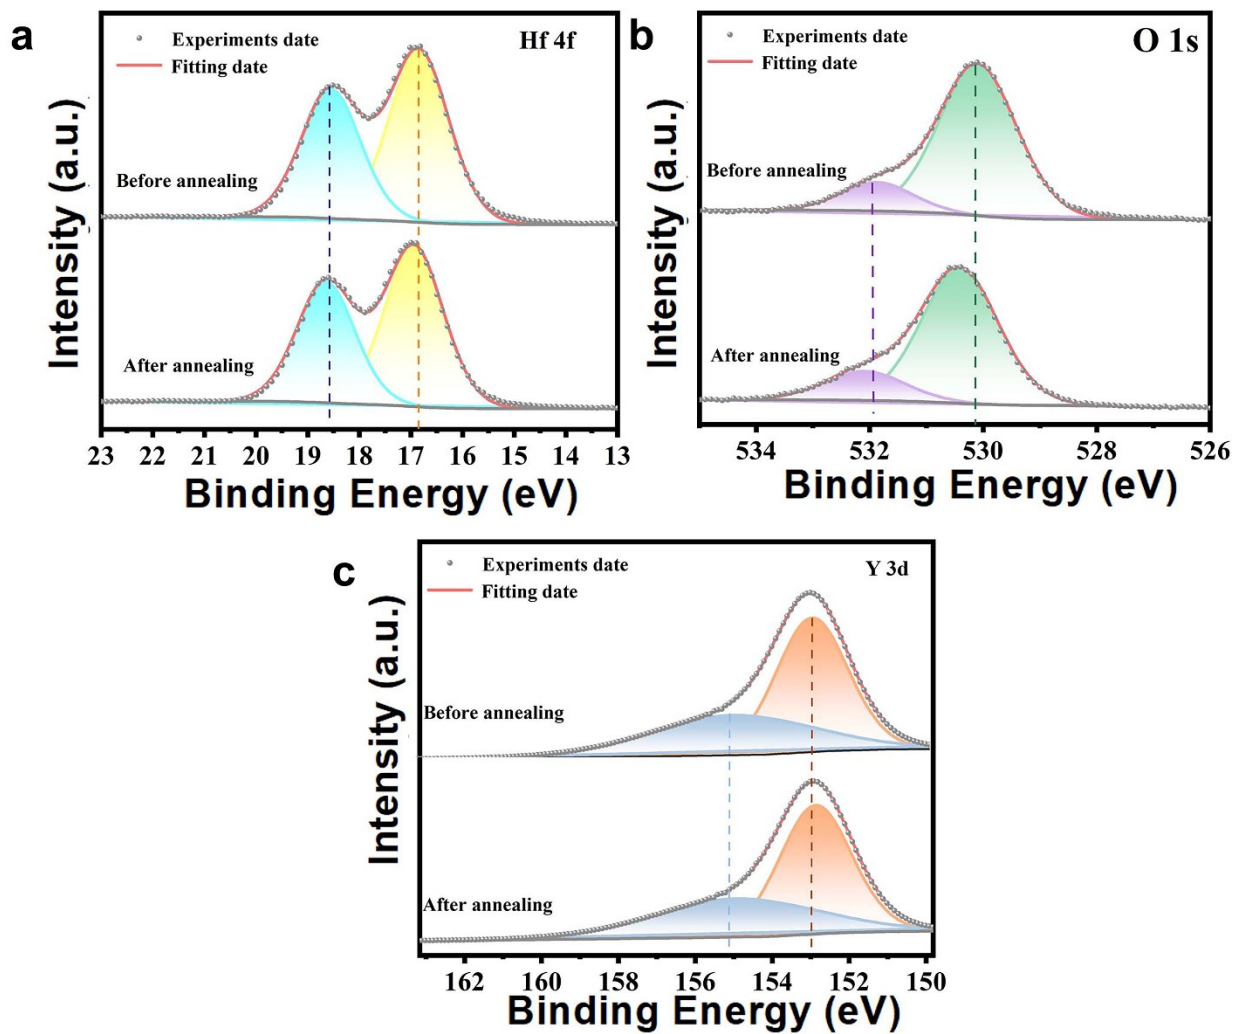

Fig. S8 (a) Compared of XPS results for CNTFET before annealing and after annealing with the Hf 4f spectra (a), O 1s spectra (b) and the Y 3d spectra (c).

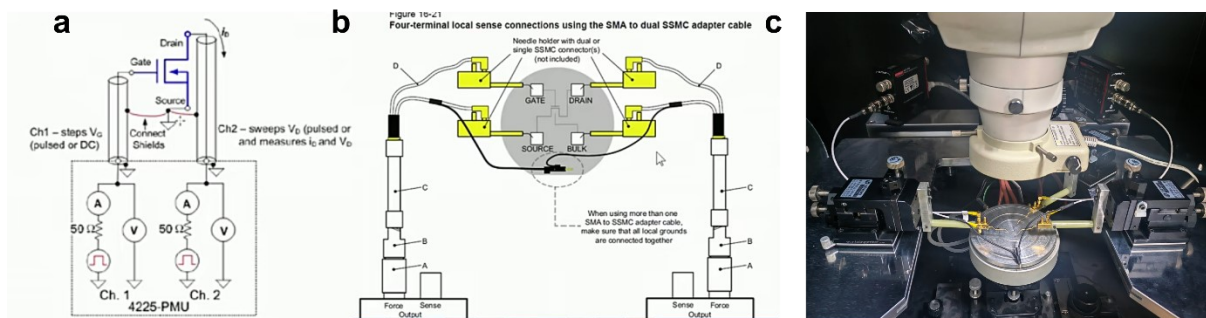

Fig. S9 (a), (b) Electronic synaptic test system and corresponding test photos (c).

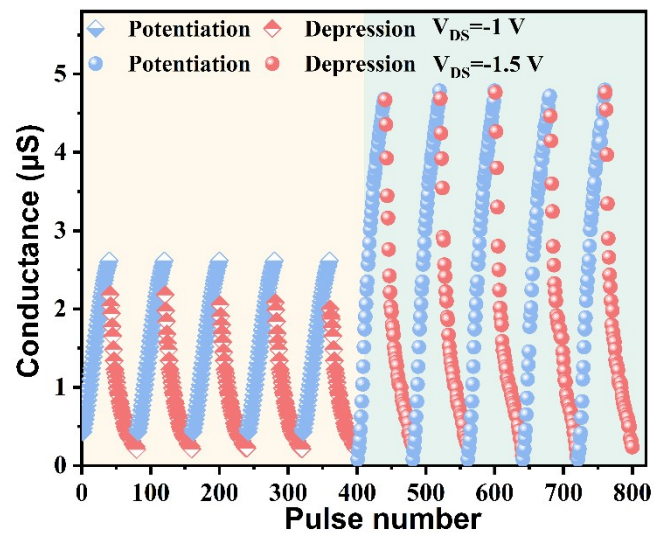

Fig. S10 Operational stability of the LTP/D characteristics of the annealed TGO CNTFET synaptic device under different  $V_{DS}$  and of various potentiation/depression pulse sets.

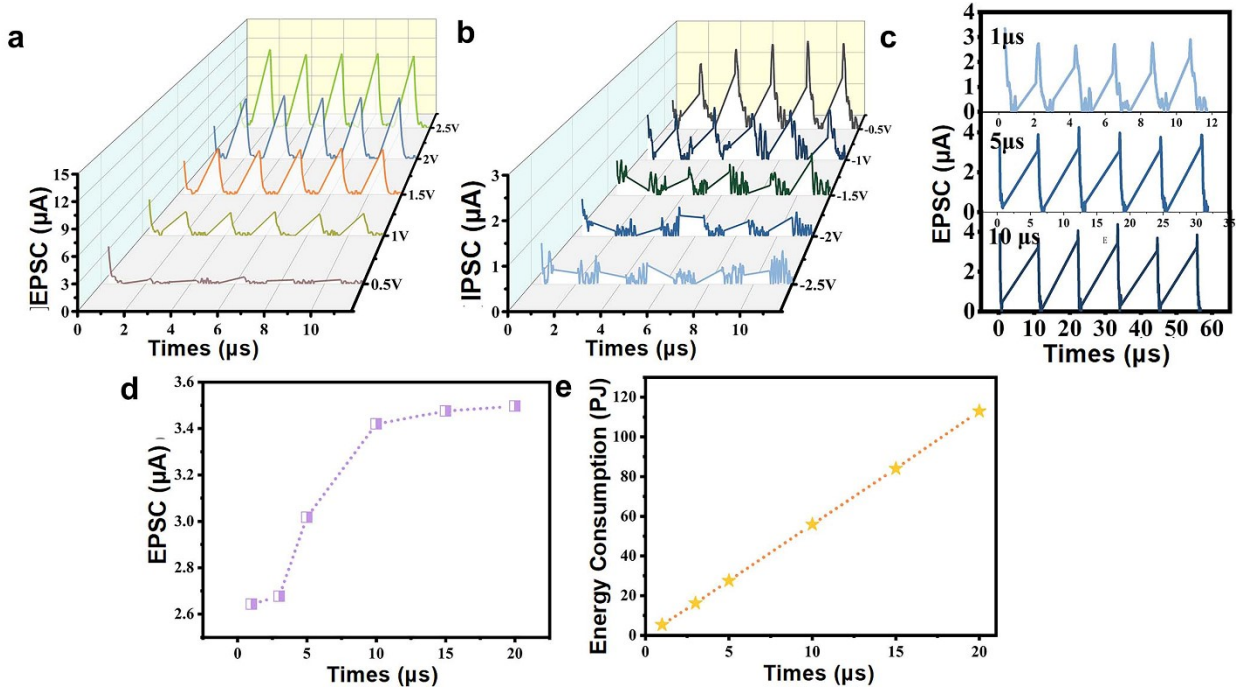

Fig. S11 (a) EPSC varies with the pre-synaptic pulse amplitude. (b) IPSC varies with the pre-synaptic pulse amplitude. (c) EPSC varies with the pre-synaptic pulse width. (d) The relationship curve between pulse width and EPSC. (e) Energy consumption of CNTFET.

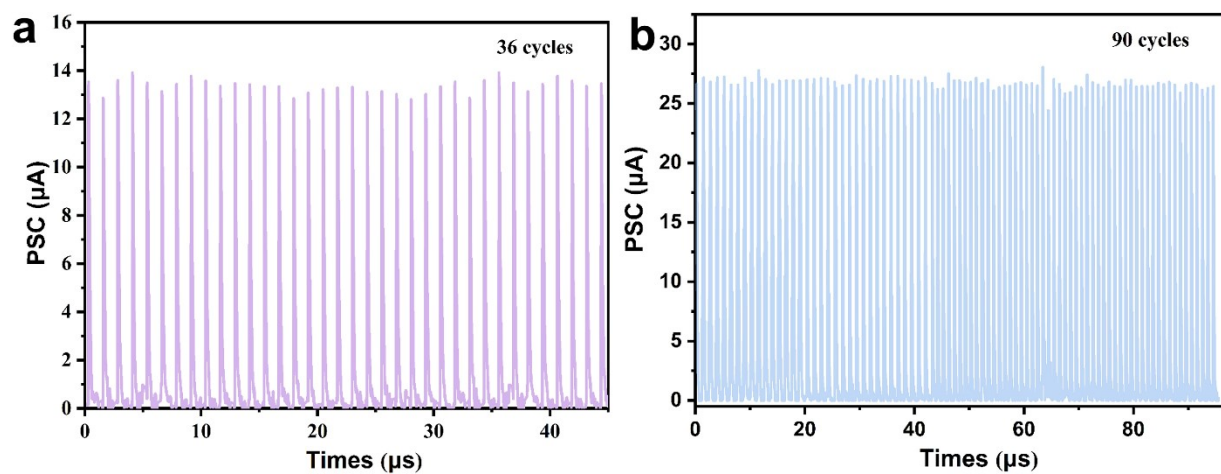

Fig. S12 Operation PSC stability of TGO CNTFET (a) and (b) annealed TGO CNTFET.

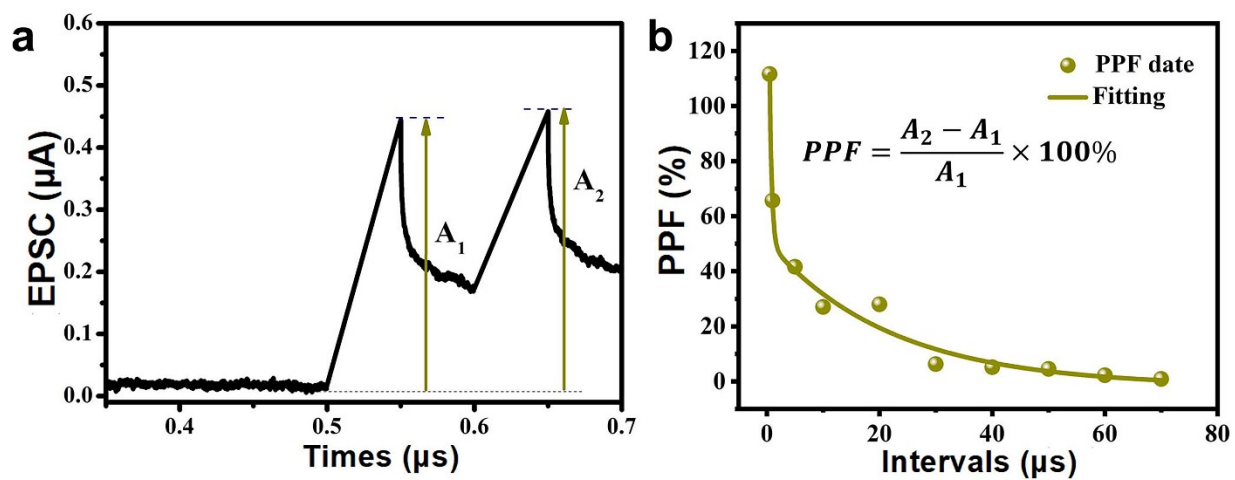

Fig. S13 (a) EPSC triggered by paired spikes (each spike: 3 V, 50 ms). A<sub>1</sub> and A<sub>2</sub> are EPSC value of the first and second spikes, respectively. (b) PPF index varies with pulse interval.

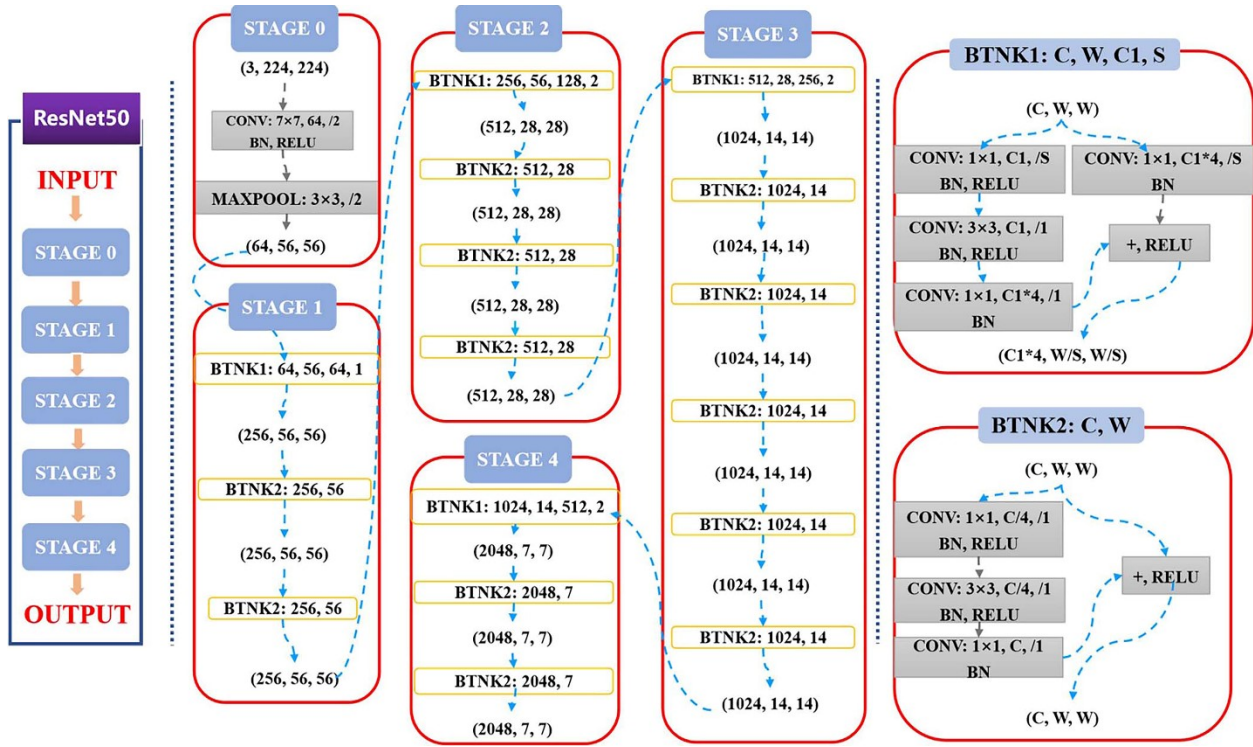

Fig. S14 The detailed flowchart and corresponding key codes of ResNet-50
